# Supplementary material
Source: PubMed Central journal article supplement (PMC4867448)

# Supplementary Figure 1

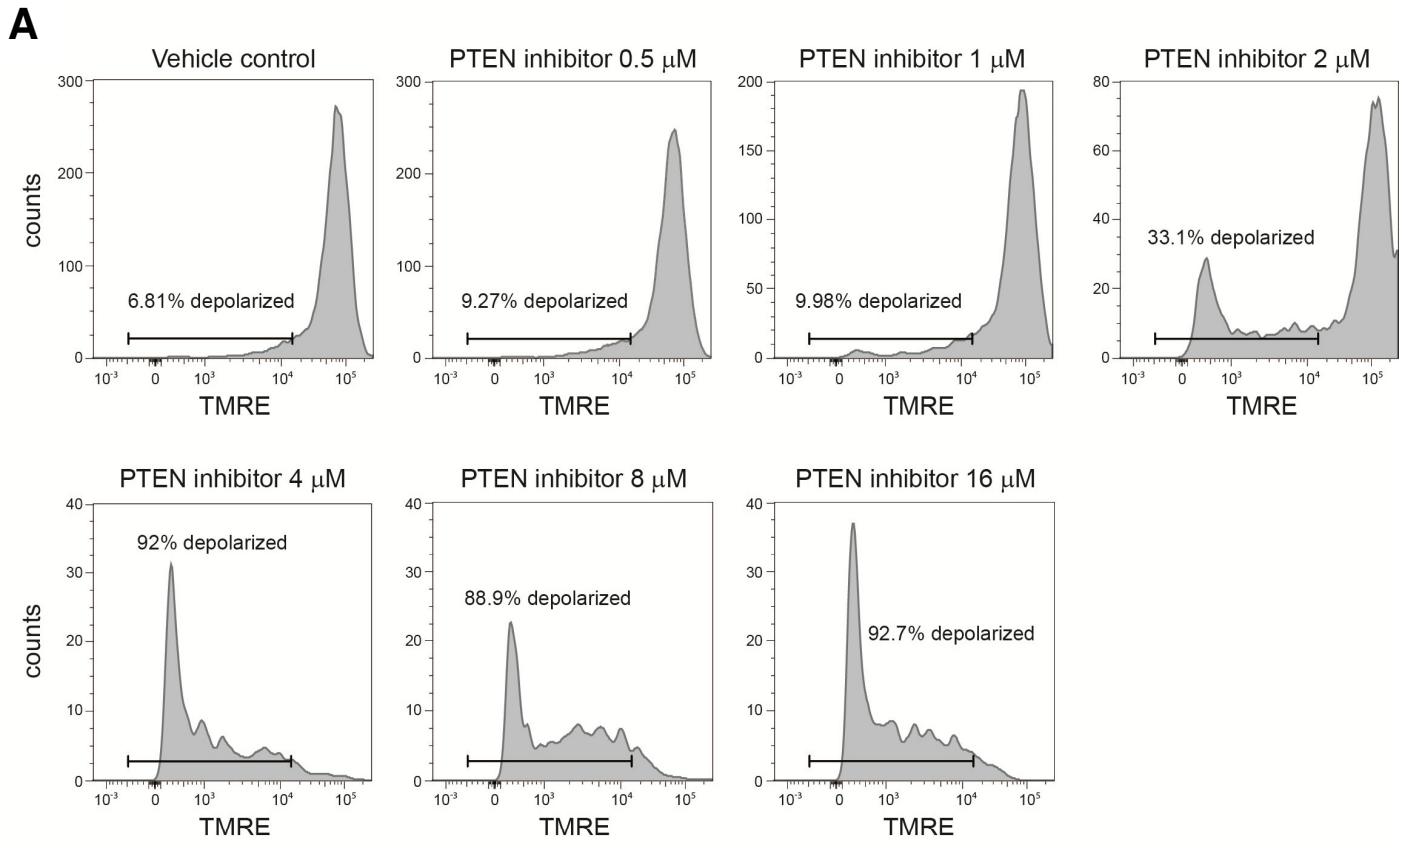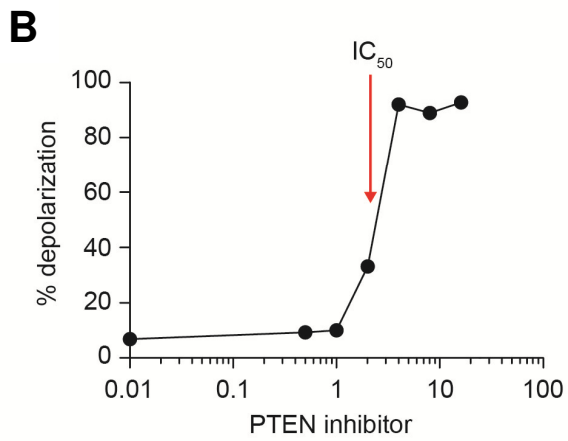

Supplement: ejhg2015209x1.pdf [file ejhg2015209x1.pdf]
